# Supplementary material for: Loss of Nuclear Activity of the FBXO7 Protein in Patients with Parkinsonian-Pyramidal Syndrome (PARK15)
Source: PubMed Central journal article supplement (PMC3037939; doi:10.1371/journal.pone.0016983), 2011-02-11

## **Figure S2**

Validation of the specificity of the FBXO7 antibody by immunofluorescence in stable *FBXO7* gene knock down HEK 293T cells

The endogenous FBXO7 protein is visualized in red by using a mouse primary anti-FBXO7 antibody (Abnova) and a Cy3-coupled secondary anti-mouse antibody. The nucleus (Hoechst staining) is depicted in green. (scale bars, 10  $\mu$ m)

Mock: untransfected cells

shNT: non-targeting shRNA

KD: *FBXO7* knock down shRNA

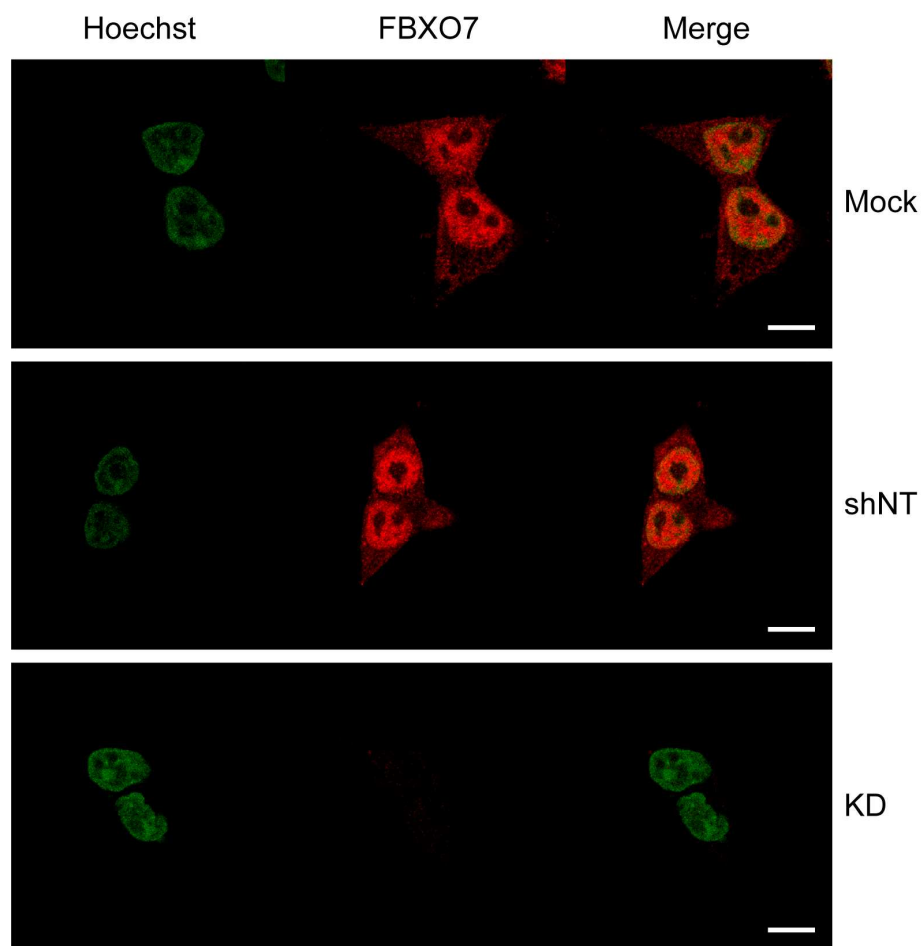

Supplement: pone.0016983.s002.pdf [file pone.0016983.s002.pdf]
