# Supplementary material for: Loss of Nuclear Activity of the FBXO7 Protein in Patients with Parkinsonian-Pyramidal Syndrome (PARK15)
Source: PubMed Central journal article supplement (PMC3037939; doi:10.1371/journal.pone.0016983), 2011-02-11

### Figure S3

qPCR analysis of *FBXO7* isoform-specific transcripts in members of the PARK15 families and unrelated healthy controls (C1-C3)

**A – target transcript: *FBXO7* isoform 1; reference transcript: *HPRT***

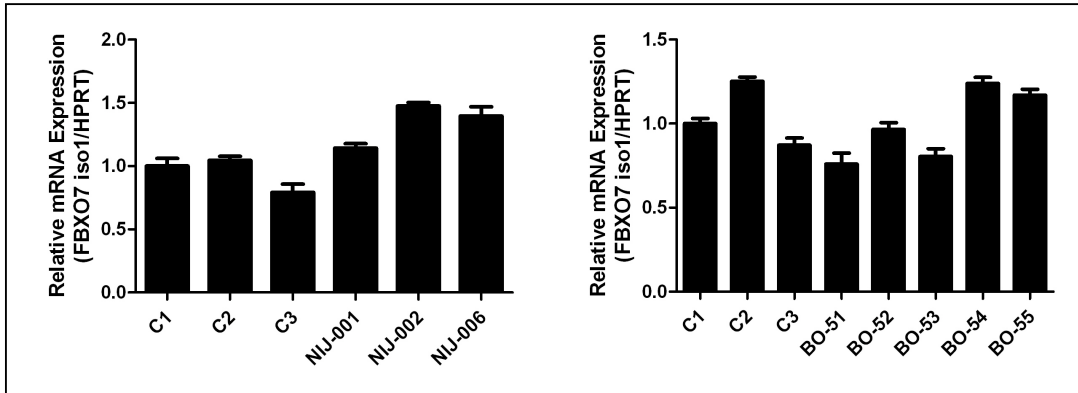

**B – target transcript: *FBXO7* isoform 2; reference transcript: *HPRT***

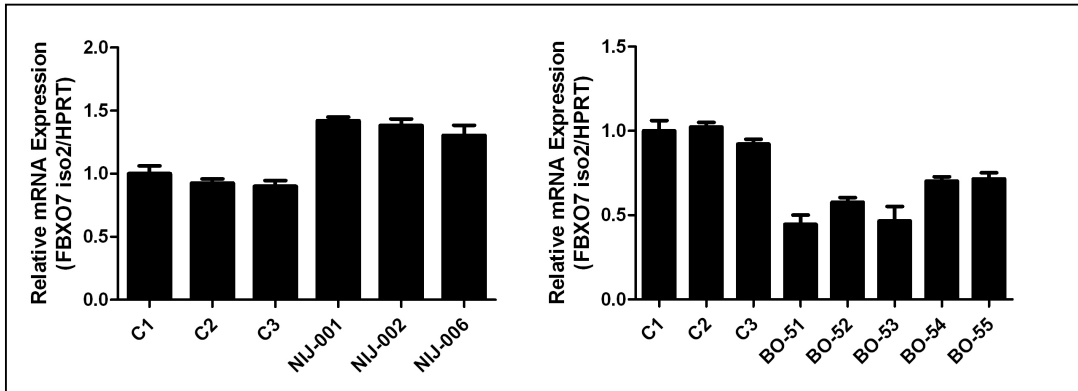

**C – target transcript: *FBXO7* isoform 1; reference transcript: *FBXO7* isoform 2**

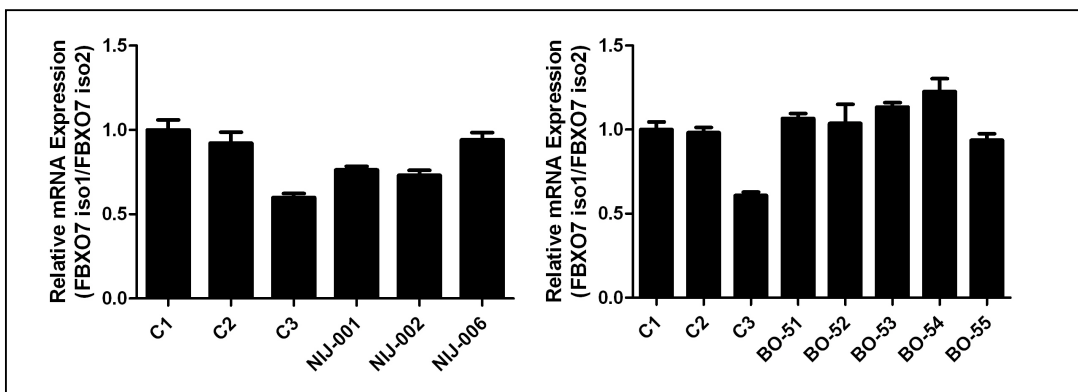

Supplement: pone.0016983.s003.pdf [file pone.0016983.s003.pdf]
