# Supplementary material for: Loss of Nuclear Activity of the FBXO7 Protein in Patients with Parkinsonian-Pyramidal Syndrome (PARK15)
Source: PubMed Central journal article supplement (PMC3037939; doi:10.1371/journal.pone.0016983), 2011-02-11
Supplement: pone.0016983.s005.pdf [file pone.0016983.s005.pdf]

**Figure S5** Positively charged amino acids in the FBX07 protein

The positively charged amino acids in the FBX07 protein are highlighted in yellow. Note the abundance at N-terminus.

mrlrvrllkrtwplevpeteptlghlrshlrqslctwgysntrftitlnykdpltgdeetlasygivsgd  
liclilqddipapnipsstdsehsslqnneqpslatssnqtsmqdeqpsdsfqqaaqsgvwnd  
dsmlgpsqnfaesiqdnahmaegtgyfypsepmlcsesvegqvphsletlyqsadcsdanda  
livlihlmllesgyipqgteakalsmpekwwklsqvyklqymhplcegssatltcvplgnlivvnatk  
nneirsvkrlqlpesfickekIgenvaniykdIqklsrlfkdqIvypIlafrqalnIpdvfglvvlplek  
lrifrlldvrsvlslsavcrdlftasndpllwrfllylrdfndntvrIvqdtwkelyrkrhiqrkespkgrfv  
mlIpssthIpfypnplhprpfpssrlppgiiggeydqrptlpyvgdpisslipgpgetpsqfpplrpr  
fdpvgplpgpnplpgrggpndrfprpsrgprptdgrlsfm
