# Supplementary material for: Loss of Nuclear Activity of the FBXO7 Protein in Patients with Parkinsonian-Pyramidal Syndrome (PARK15)
Source: PubMed Central journal article supplement (PMC3037939; doi:10.1371/journal.pone.0016983), 2011-02-11
Supplement: pone.0016983.s006.pdf [file pone.0016983.s006.pdf]

**Table S1** Primers used for molecular cloning

| <b>Constructs</b> | <b>Forward primer (5'-3')</b>             | <b>Reverse primer (5'-3')</b>             |
|-------------------|-------------------------------------------|-------------------------------------------|
| FBX07-V5-His      | TCGCCAGTCCGGGGTCGTC                       | AAGCTTCATGAATGACAGCCGGCCATC               |
| eGFP-FBX07        | CAGGAGAAGCTTAGGCTGCGGGTGC<br>G            | CGCCCGGGCTTCATGAATGACAGC                  |
| WT FBX07          | GCCGGCTGTCATTCATGTAGCTTAAG<br>GGCAATTCTGC | GCAGAATTGCCCTTAAGCTACATGAATG<br>ACAGCCGGC |
| T22M FBX07        | CCCGAGACGGAGCCGATGCTGGGGC<br>ATTTGCGC     | GCGCAAATGCCCCAGCATCGGCTCCGT<br>CTCGGG     |
| R378G FBX07       | GGAGGTTTTTATATCTGGGTGATTTTC<br>GAGAC      | GTCTCGAAAATCACCCAGATATAAAAAC<br>CTCC      |
| R498X FBX07       | CCTAACCCCATCTTGCCAGGGTGAGG<br>CGGCC       | GGCCCGCCTCACCTGGCAAGATGGGG<br>TTAGG       |
| FBX07-profilin    | GCCAGCTAGCATGAGGCTGCGG                    | GCAGGCTAGCGTGTACCCCCAG                    |
