# Supplementary material for: Loss of Nuclear Activity of the FBXO7 Protein in Patients with Parkinsonian-Pyramidal Syndrome (PARK15)
Source: PubMed Central journal article supplement (PMC3037939; doi:10.1371/journal.pone.0016983), 2011-02-11
Supplement: pone.0016983.s007.pdf [file pone.0016983.s007.pdf]

**Table S2**      **Primers used for qPCR**

| <b>Gene</b>                  | <b>Forward primer (5'-3')</b> | <b>Position</b> | <b>Reverse primer (5'-3')</b> | <b>Position</b> |
|------------------------------|-------------------------------|-----------------|-------------------------------|-----------------|
| FBXO7<br>transcript 1        | AGTCCCTGCTGTGCACCTG           | Exon 1a         | CGCTGGAATGTCATCTTGAAGA        | Exon 2a         |
| FBXO7<br>transcript 2        | AACATGGCCCGGCCTC              | Exon 1b         | TTCTGGAGTGAAGAATGCTCTGAA      | Exon 2b         |
| FBXO 7<br>Transcript 1 and 2 | GTCTGCGGTTTGTCTGACC           | Exon 7          | TCTTGA ACTCTGACAGTATTG        | Exon 8          |
| HPRT                         | TGACACTGGCAAACAATGCA          |                 | GGTCCTTTTCACCAGCAAGCT         |                 |
